# Supplementary material for: Sources of oceanic and volcanic heat melting a subglacial channel in Kamb Ice Stream, West Antarctica
Source: Research Square preprint supplement (doi:10.21203/rs.3.rs-8318360/v1), 2025-12-17
Supplement: Supplementary file 1 [file a16f0fae4ccd4515fa0aebaf.pdf]

# Supplementary information for

## Sources of oceanic and volcanic heat melting a subglacial channel in Kamb Ice Stream, West Antarctica

Peter Washam<sup>1\*</sup>, Britney E. Schmidt<sup>1,2</sup>, Brice Loose<sup>3</sup>, Huw J. Horgan<sup>4,5,6</sup>, Craig L. Stewart,<sup>7</sup> Craig L. Stevens,<sup>7,8</sup> Justin D. Lawrence,<sup>9</sup> Christina L. Hulbe,<sup>10</sup> Andrew D. Mullen,<sup>1</sup> Enrica S. Quartini,<sup>1</sup> Benjamin Hurwitz<sup>11</sup>

<sup>1</sup>Cornell Center for Astrophysics and Planetary Science, Cornell University, Ithaca, NY, USA.

<sup>2</sup>Department of Earth and Atmospheric Sciences, Cornell University, Ithaca, NY, USA.

<sup>3</sup>Graduate School of Oceanography, University of Rhode Island, Narragansett, Rhode Island, USA.

<sup>4</sup>Laboratory of Hydraulics, Hydrology and Glaciology (VAW), ETH Zurich, Zurich, Switzerland.

<sup>5</sup>Swiss Federal Institute for Forest, Snow, and Landscape Research (WSL), Birmensdorf, Switzerland.

<sup>6</sup>Antarctic Research Centre, Victoria University of Wellington, Wellington, New Zealand.

<sup>7</sup>Ocean Dynamics Group, National Institute for Water and Atmospheric Research, Greta Point, Wellington, New Zealand.

<sup>8</sup>Department of Physics, University of Auckland, Auckland, New Zealand.

<sup>9</sup>Honeybee Robotics, Altadena, CA, USA.

<sup>10</sup>School of Surveying, University of Otago, Dunedin, New Zealand.

<sup>11</sup>Ocean Science and Engineering, Georgia Institute of Technology, Atlanta, GA, USA.

\*Corresponding author. Email: [pwasham@cornell.edu](mailto:pwasham@cornell.edu)

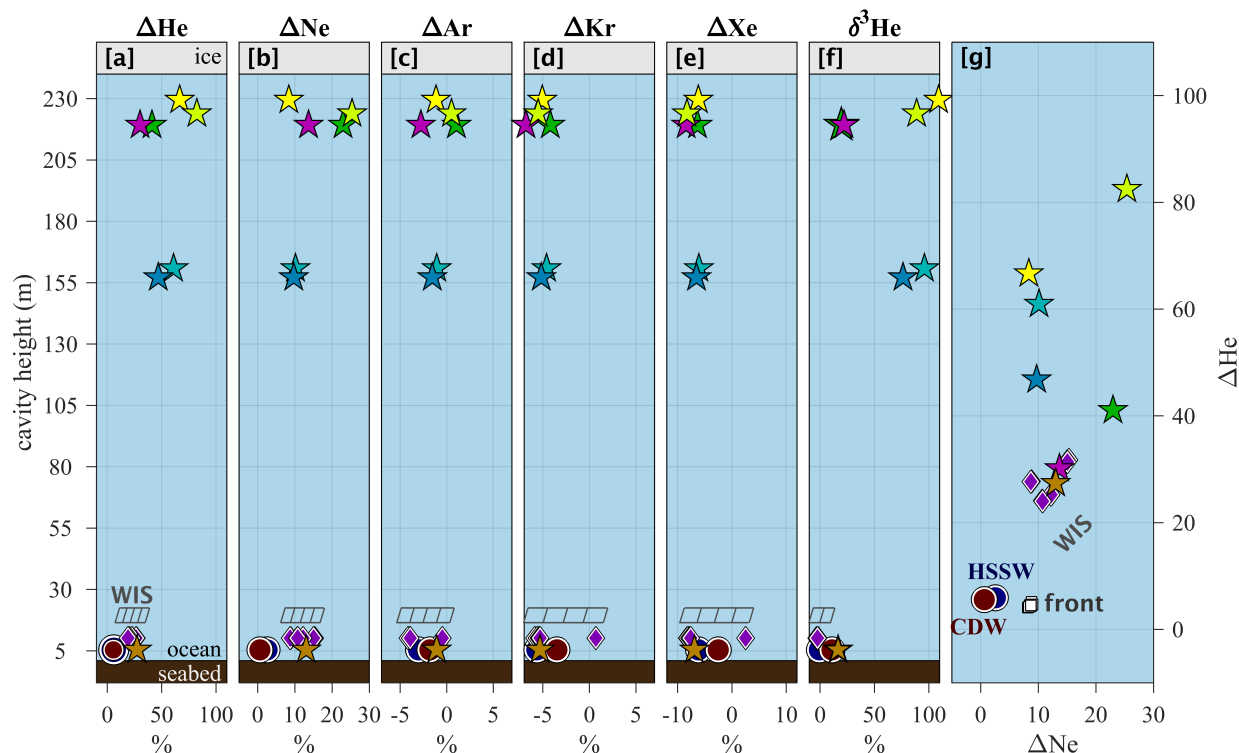

**Supplementary Fig. 1 | Noble gas saturation anomalies in the subglacial channel cavity.** Saturation anomalies ( $\Delta = (C_{\text{obs}}/C_{\text{eq}} - 1) \times 100$ ) of (a) helium (He), (b) neon (NE), (c) argon (Ar), (d) krypton (Kr), (e) xenon (Xe), and (f)  $^3\text{He}/^4\text{He}$  isotopic percent deviation from atmospheric values ( $\delta^3\text{He}$ ) from water samples collected at discrete depths. (g)  $\Delta\text{He} - \Delta\text{Ne}$  diagram of data shown in (a, b). The burgundy and navy-blue circles represent values for CDW and HSSW, respectively. CDW values come from refs. 17,26 and HSSW values come from a water sample collected in McMurdo Sound. Additional data come from the WIS GL (purple diamonds, ref. 25) and the Ross Ice Shelf front (white squares, ref. 18). Note that one sample from WIS contained

anomalously high  $\Delta\text{Ar}$ ,  $\Delta\text{Kr}$ , and  $\Delta\text{Xe}$  levels and is excluded from further analysis. See Fig. 1a for the geographic locations of samples.

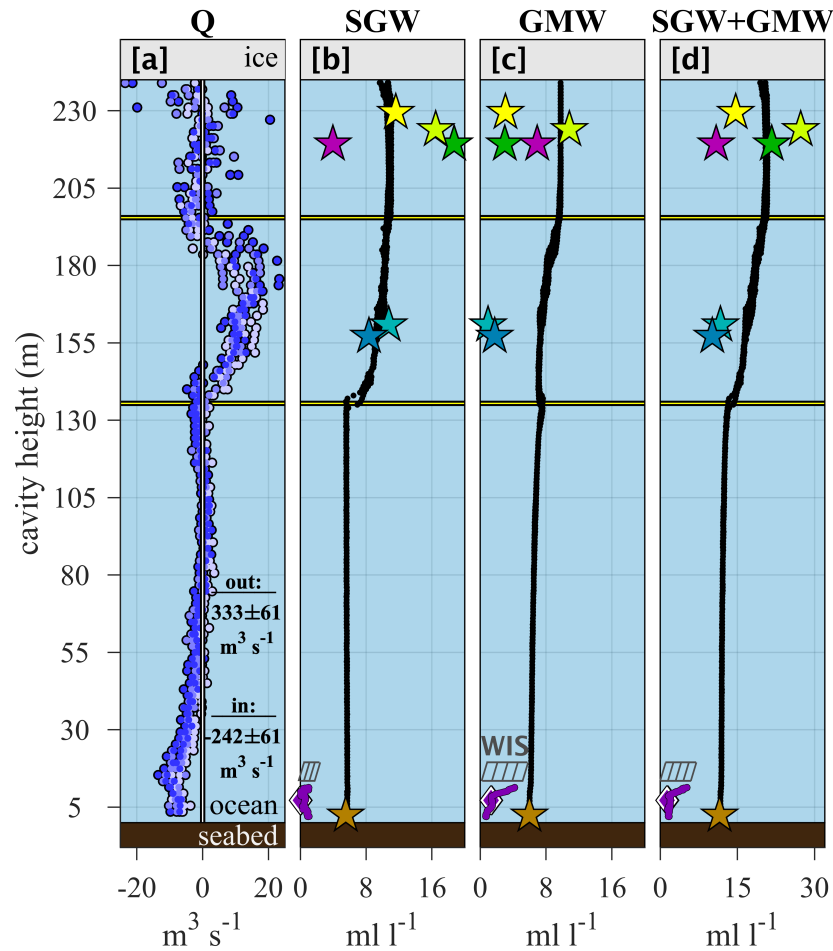

**Supplementary Fig. 2 | Concentrations of meltwater in the subglacial channel cavity.** (a) Vertical profiles of water volume flux (Q) through the channel and concentrations of (b) glacial meltwater (GMW), (c) subglacial freshwater (SGW), and (d) total meltwater (GMW + SGW). Concentrations from discrete water samples (stars) are estimated with an OMP analysis and vertical profiles are estimated with temperature and salinity. The GMW and SGW profiles in the channel have been adjusted with the OMP-derived concentration in the bottom water sample near the seabed. The WIS channels have not, because no samples were collected at the seabed.
